# Supplementary material
Source: publisher figshare collection journal article supplement (https://geolsoc.figshare.com/articles/dataset/_/3453911)

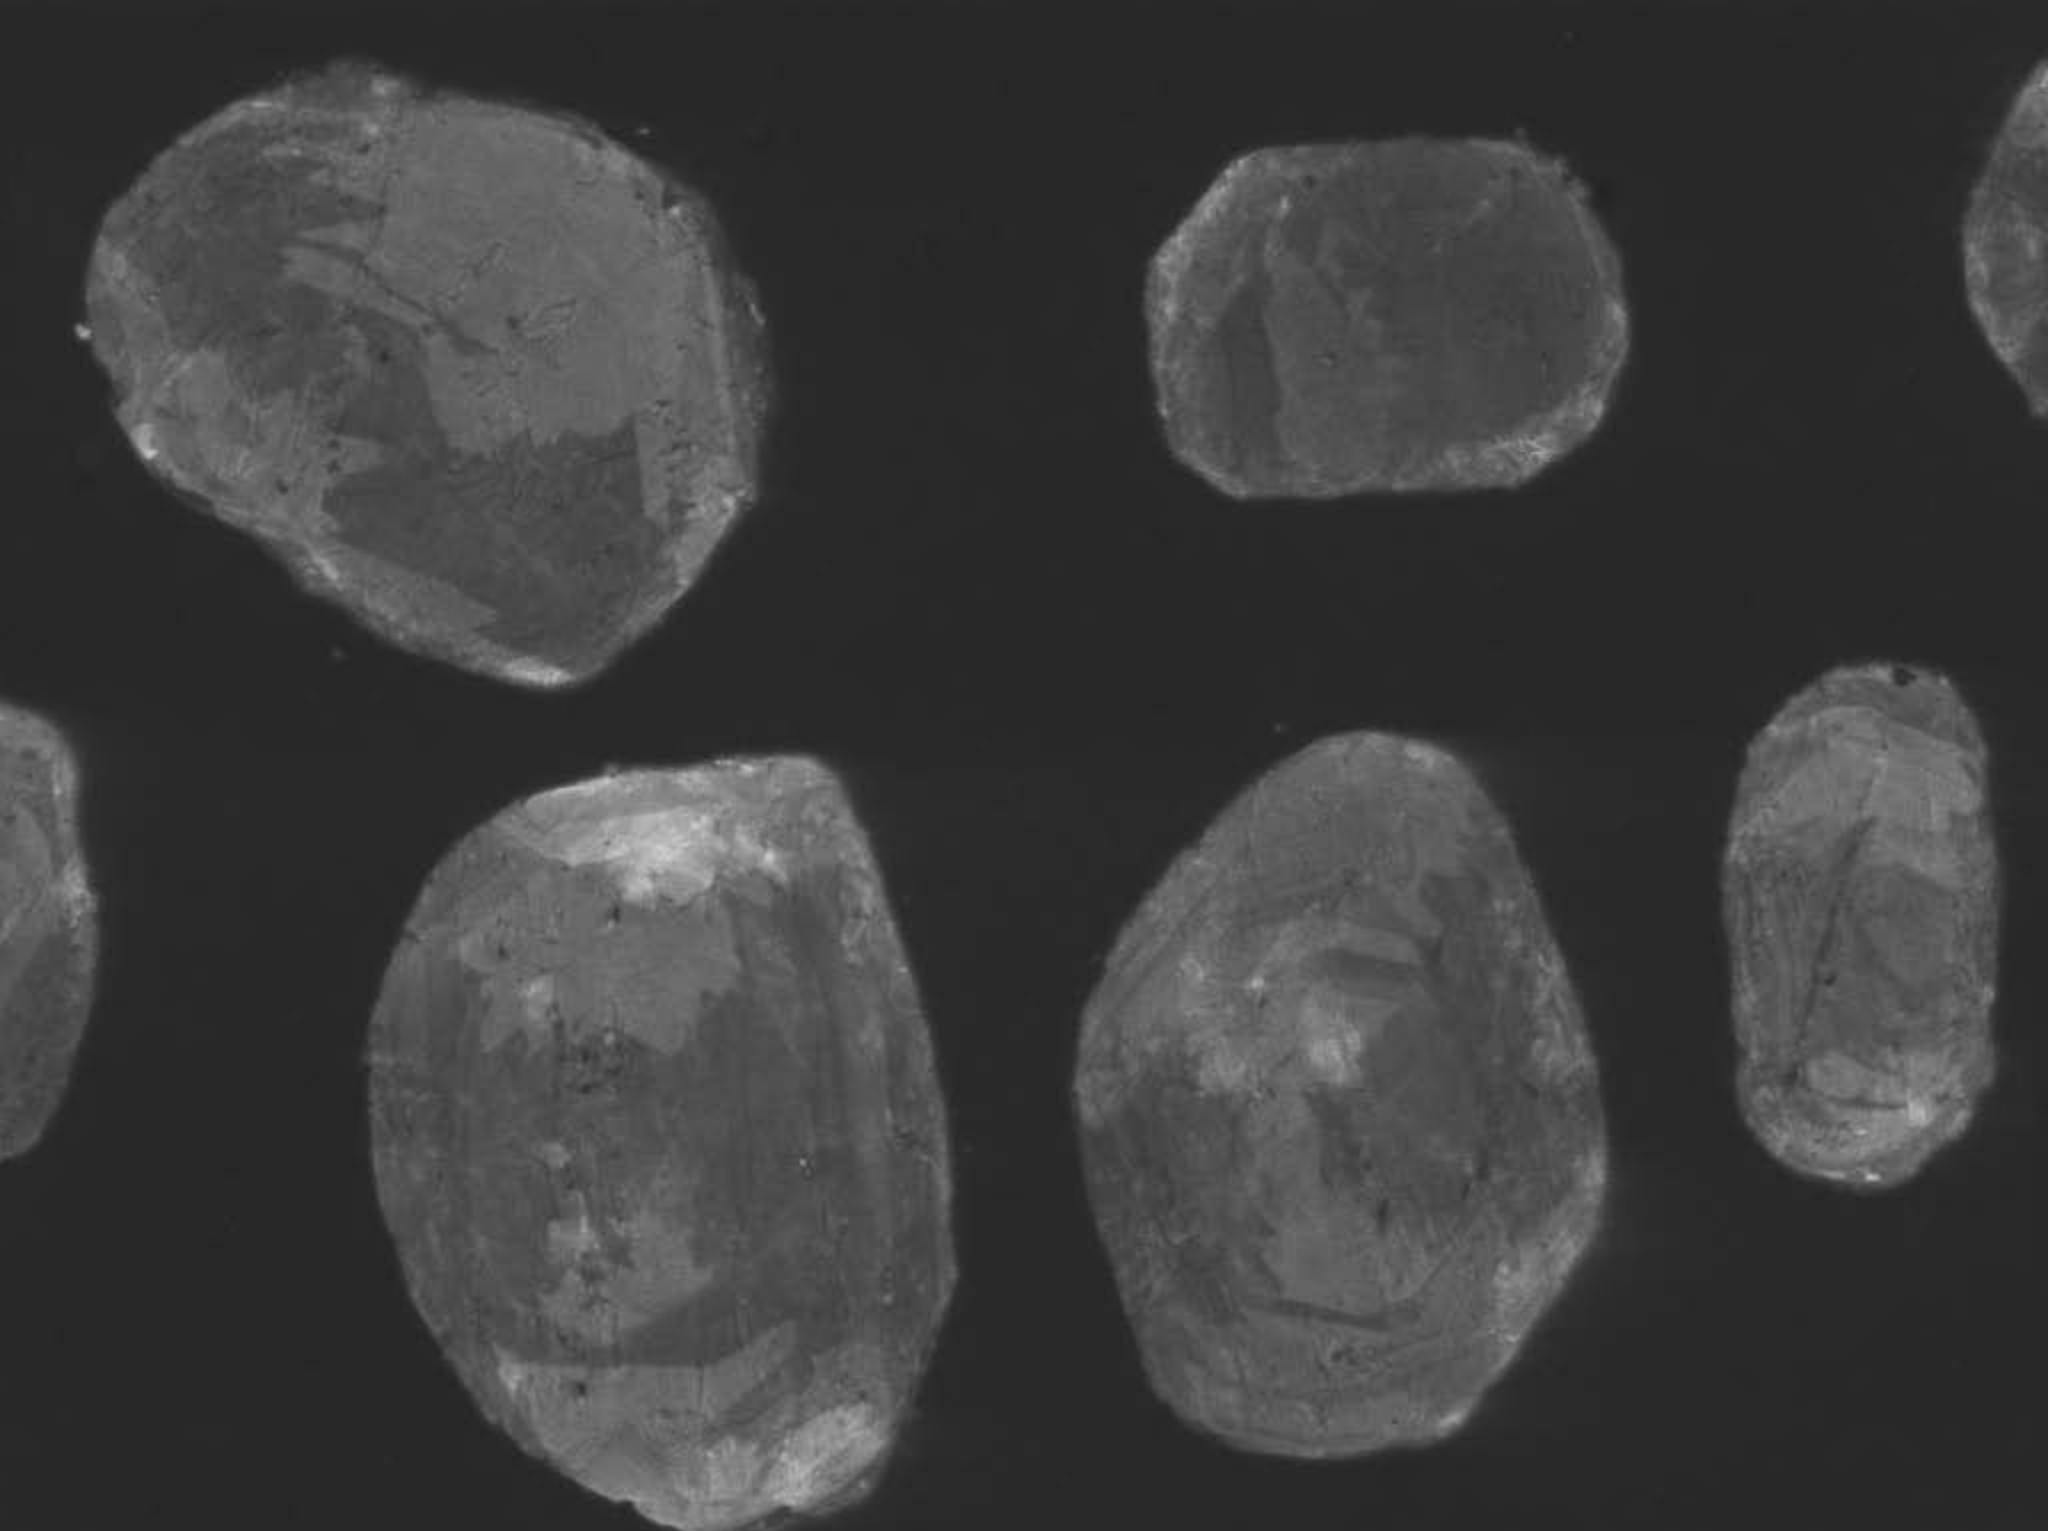

SEM HV: 10.00 kV  
SEM MAG: 1.00 kx  
Date(m/d/y): 05/24/13

WD: 10.78 mm  
Det: SE Detector + CL  
Name: T33694

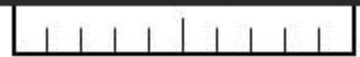

50 μm

MIRAX TESCAN

Digital Microscopy Imaging 

Supplement: Supplementary file 1 [file 1]
